# Supplementary material for: Cancer-related Fatigue in Relation to Chronotype and Sleep Quality in (Non-)Hodgkin Lymphoma Survivors
Source: PubMed Central journal article supplement — J Biol Rhythms. 2021 Jan 22;36(1):71–83. doi: 10.1177/0748730420987327 (PMC7924108; doi:10.1177/0748730420987327), 2021-01-22
Supplement: sj-pdf-1-jbr-10.1177_0748730420987327.pdf [file sj-pdf-1-jbr-10.1177_0748730420987327.pdf]

Supplementary material

**Table S1:** Linear model of independent variables on the continuous value of the VAS-fatigue on complete cases (N=379)

|                       | Model 1† |      |        |       |          | Model 2†                   |       |        |       |          |        |
|-----------------------|----------|------|--------|-------|----------|----------------------------|-------|--------|-------|----------|--------|
|                       | <i>B</i> | (SE) | 95% CI |       | <i>p</i> | <i>B</i>                   | (SE)  | 95% CI |       | <i>p</i> |        |
| Constant              | 7.69     | 0.71 | 6.29   | 9.09  |          | Constant                   | 3.50  | 0.74   | 2.05  | 4.95     |        |
| Intermediate aMS      | 0.25     | 0.27 | -0.29  | 0.79  | .36      | Intermediate aMS           | 0.05  | 0.23   | -0.39 | 0.50     | .82    |
| Late aMS              | 0.09     | 0.36 | -0.63  | 0.80  | .81      | Late aMS                   | -0.19 | 0.31   | -0.80 | 0.42     | .54    |
| Age                   | -0.06    | 0.01 | -0.08  | -0.04 | <.001*   | Age                        | -0.02 | 0.01   | -0.04 | 0.00     | .05    |
| Male                  | -0.48    | 0.27 | -1.01  | 0.06  | .08      | Male                       | -0.38 | 0.23   | -0.83 | 0.07     | .10    |
| BMI: overweight       | 0.40     | 0.27 | -0.13  | 0.94  | .14      | BMI: overweight            | 0.22  | 0.22   | -0.20 | 0.65     | .30    |
| BMI: obese            | 0.40     | 0.38 | -0.34  | 1.14  | .29      | BMI: obese                 | 0.25  | 0.30   | -0.34 | 0.84     | .41    |
| Married               | -0.44    | 0.30 | -1.03  | 0.14  | .14      | Married                    | 0.14  | 0.25   | -0.34 | 0.62     | .57    |
| College or university | 0.21     | 0.26 | -0.30  | 0.71  | .43      | College or university      | -0.12 | 0.21   | -0.53 | 0.30     | .58    |
| NHL                   | 0.25     | 0.31 | -0.35  | 0.85  | .42      | NHL                        | -0.03 | 0.25   | -0.52 | 0.46     | .91    |
| Time since diagnosis  | 0.00     | 0.01 | -0.03  | 0.03  | .83      | Time since diagnosis       | 0.00  | 0.01   | -0.02 | 0.02     | .95    |
| Comorbidities         | 0.39     | 0.09 | 0.22   | 0.55  | <.001*   | Comorbidities              | 0.05  | 0.07   | -0.10 | 0.20     | .49    |
| Part time employment  | -0.66    | 0.38 | -1.42  | 0.09  | .09      | Part time employment       | -0.40 | 0.33   | -1.04 | 0.24     | .22    |
| Fulltime employment   | -0.89    | 0.35 | -1.57  | -0.21 | .01      | Fulltime employment        | -0.23 | 0.29   | -0.81 | 0.35     | .43    |
|                       |          |      |        |       |          | Subjective sleep quality 1 | 0.89  | 0.28   | 0.35  | 1.44     | .001*  |
|                       |          |      |        |       |          | Subjective sleep quality 2 | 1.39  | 0.39   | 0.63  | 2.15     | <.001* |
|                       |          |      |        |       |          | Subjective sleep quality 3 | 2.93  | 0.75   | 1.45  | 4.41     | <.001* |
|                       |          |      |        |       |          | Sleep latency 1            | 0.19  | 0.24   | -0.29 | 0.67     | .44    |
|                       |          |      |        |       |          | Sleep latency 2            | 0.46  | 0.33   | -0.19 | 1.10     | .16    |
|                       |          |      |        |       |          | Sleep latency 3            | 0.29  | 0.51   | -0.71 | 1.29     | .57    |
|                       |          |      |        |       |          | Sleep duration 1           | -0.13 | 0.29   | -0.69 | 0.43     | .64    |
|                       |          |      |        |       |          | Sleep duration 2           | -1.41 | 0.43   | -2.25 | -0.58    | .001*  |
|                       |          |      |        |       |          | Sleep duration 3           | -1.89 | 0.90   | -3.65 | -0.11    | .04    |
|                       |          |      |        |       |          | Sleep efficiency 1         | 0.06  | 0.30   | -0.54 | 0.66     | .85    |
|                       |          |      |        |       |          | Sleep efficiency 2         | 0.67  | 0.56   | -0.44 | 1.77     | .24    |
|                       |          |      |        |       |          | Sleep efficiency 3         | 2.05  | 0.90   | 0.28  | 3.81     | .02    |
|                       |          |      |        |       |          | Sleep disruptions 1        | -0.59 | 0.44   | -1.45 | 0.27     | .18    |
|                       |          |      |        |       |          | Sleep disruptions 2        | -0.67 | 0.51   | -1.66 | 0.33     | .19    |

|                        |       |      |       |      |        |
|------------------------|-------|------|-------|------|--------|
| Sleep disruptions 3    | 0.65  | 0.86 | -1.03 | 2.34 | .45    |
| Sleep medication 1     | -0.18 | 0.61 | -1.38 | 1.03 | .78    |
| Sleep medication 2     | -0.29 | 0.64 | -1.55 | 0.97 | .65    |
| Sleep medication 3     | 0.53  | 0.45 | -0.36 | 1.41 | .24    |
| Daily dysfunctioning 1 | 2.32  | 0.25 | 1.82  | 2.81 | <.001* |
| Daily dysfunctioning 2 | 3.31  | 0.31 | 2.70  | 3.91 | <.001* |
| Daily dysfunctioning 3 | 3.20  | 0.57 | 2.08  | 4.32 | <.001* |

$R^2 = .17$

$R^2 = .52$

$\Delta R^2 = .35, p < .001$

**aMS** average midsleep; **BMI** Body Mass Index; **NHL** Non-Hodgkin lymphoma;

† For model 1, a Bonferroni corrected p-value of 0.0038 (0.05/13) was used. For model 2, a Bonferroni corrected p-value of 0.0015 (0.05/34) was used.

\* <.0038 (model 1) or <.0015 (model 2)

Intermediate aMS: intermediate aMS (1) vs early aMS (0) and late aMS (0)

Late aMS: late aMS (1) vs early aMS (0) and intermediate aMS (0)

Age: included as continuous variables in years

Male: male (1) vs female (0)

BMI overweight: BMI overweight (1) vs BMI healthy (0) and BMI obese (0)

BMI obese: BMI obese (1) vs BMI healthy (0) and BMI overweight (0)

Married: married or living together (1) vs single, widow or divorced (0)

College or university: college or university (1) vs primary education, high school or vocational education (0)

NHL: non-Hodgkin lymphoma (1) vs Hodgkin lymphoma (0)

Time since diagnosis: included as continuous variable in years

Comorbidities: included as continuous variable in number of self-reported comorbidities.

Part time employment: part time employed (1) vs no employment (0) or fulltime employment (0)

Fulltime employment: fulltime employed (1) vs no employment (0) or part time employment (0)

Subjective sleep quality: reference category is good subjective sleep quality (0)

Sleep latency: reference category is no problems (0)

Sleep duration: reference category is more than 7 hours (0)

Sleep efficiency: reference category is more than 85% (0)

Sleep disruptions: reference category is no disruptions (0)

Sleep medication: reference category is no sleep medication (0)

Daily dysfunctioning: reference category is no dysfunctioning (0)
